# Supplementary material
Source: publisher figshare collection journal article supplement (https://gsajournals.figshare.com/ndownloader/files/23021741)
Supplement: Supplementary file 1 [file 23021741]

***Supplementary Table S1.*** *Primers used in the study*

| **Primer ID** | **Sequence(5'-3')** | **Gene Name** |
| --- | --- | --- |
| 1 | CCAAGAGGCCCTCAGACAAG | *EF-1a* |
| 2 | ACCAGTTGGGCCAAAAGTGA |
| 3 | TGCCACTCCACACATATTGCT | *4CL1* |
| 4 | GCATGATGACATCGCCTTGTC |
| 5 | ATCTCCATCTCCCACGTGGA | *ANR* |
| 6 | ACACTGGTATTGACAGCGCA |
| 7 | AATGCCCTCAACCAGAGCTC | *ANS* |
| 8 | GTGACCCATTTGCCCTCGTA |
| 9 | TGGAACCGATGATGAGTTGCA | *GL3-1* |
| 10 | TAACCACTGCCTCTGACACAC |
| 11 | GATGGACTATGGAGACCGCAG | *GL3-2* |
| 12 | TCAACCCTTCTCTCGAGGTCT |
| 13 | CACCATTTTGTCTGGACACCTTC | *C3H* |
| 14 | GTTTGTACAAGTGAGCAGGCAAT |
| 15 | AAATCTTGGTAAACGCGTGGTG | *C4H1* |
| 16 | AGCAAGGATAATTCCAGGGCAA |
| 17 | TAGAATGGGGCATTGCAGAACT | *C4H2* |
| 18 | GACTAGGAGAGGGATTGCCATG |
| 19 | AAGCTTATCAACGCCAAGAACAC | *CCOM1* |
| 20 | GGCCTTCTCTGAAGTCGATTTTG |
| 21 | TTGTGAAGGTCGGGGGATTG | *CCOM2* |
| 22 | CAACAGCCAAGGCCTTGTTC |
| 23 | GCACGGTAGGCATTTCACAATT | *CCOM3* |
| 24 | TAGTGATTCCATCGCCTAACGG |
| 25 | ACAGCTCCTTACCCGAGACT | *CHI* |
| 26 | CTTTGCTGCTGGGGAAACAC |
| 27 | TGGTCTTTTGCACCACCAGT | *CHS1* |
| 28 | TTGGCTAAGCGAAGAACCGT |
| 29 | CTACTCGGTCTTCGCCCATC |
| 30 | CAAGTCCTTGGCTAGGCGAA | *CHS2* |
| 31 | TATTTGGTGACGGTGCAGCT |
| 32 | AGGCCCACTTCACGAAGATG | *CHS3* |
| 33 | CCTAACCCTGTGGAAGGCAG |
| 34 | TTGGCATTGGAGCATGACCT | *DFR* |
| 35 | ATGCATGTGAGGTGAACGGT |
| 36 | AGCTCGAAATCATTGCCCCA | *F3’5’H1* |
| 62 | GACTCAGTGTCAACATTTGGGC |
| 63 | AGCTCCAAATGGAATCAGCTCA | *F3’5’H2* |
| 64 | CCGAAGAGAAGCTCCGGTTT |
| 65 | GTTACAGCCCTCCACCCTTC | *F3H* |
| 66 | GACTAGGTTTGGATGGGAAGGTT |
| 67 | GTCTTTCCAAACTTGAAGACCCG | *FLS1* |
| 68 | GTGGAGAGAGTGCAAGCCAT |
| 69 | ATCCTCACCACCCTCTCCTC | *FLS2* |
| 70 | CCTGGGTCTAGGAGTGTGGA | *FLS3* |
| 71 | GCAGAGGGAGGCCAAATCTT | *LAR1* |
| 72 | GAGCTTTCCTCTTTGTGGGAGA |
| 73 | TGTCGTGTGTGAATGATGCAAC | *LAR2* |
| 74 | ACCATCAAAACCGTCGACGA |
| 75 | ATTCACTGCTGCTGCTGCTA | *MYB113-1* |
| 76 | AGCTGTAGATTGAGGTGGTTGAAT |
| 77 | CGACCATCTGTTGCCTAACAATTT | *MYB113-2* |
| 78 | CCAAATGGTCTTAGGAAGGGCT | *PAL1* |
| 79 | ATGTGCTTCCAATTTCCTTGCC | *PAL2* |
| 80 | AATGGCGACGCTGAGAAGAA | *CCR1* |
| 81 | CGTGCACTCTCCACCTCTTT | *CCR2* |
| 82 | CCCTCCTCCAAGGCTACTCT | *CYP73A13* |
| 83 | CAACTGCCTTGGAATTGGGC | *UDP75L121* |
| 84 | GGCTGCTGCTGCTTTTTATGT | *UDP75L122* |
| 85 | TGGTGAGGAGCCAACACTAAC | *UDP75L123* |
| 86 | TGACGATGATGGGCGTATCG | *UDP78A15* |
| 87 | TAATCGACGGCGGGAATGAG | *UDP94P11* |
| 88 | AGAAGGGAGAGATCAACGAGGA | *UDP94P12* |
